# Supplementary material
Source: Elsevier journal article supplement (https://www.sciencedirect.com/science/article/pii/S0870255120304674)
Supplement: mmc1 [file S0870255120304674:mmc1.doc]

**TABELA A (Material Suplementar)**

**Características dos principais testes de imagem para avaliação de doença coronária**

| Teste de Imagem | Indicações e vantagens | Limitações e desvantagens |
| --- | --- | --- |
| *Estudo anatómico não invasivo*  Angio-TC coronário | . Baixa probabilidade ou probabilidade intermédia/baixa DC  . Sem história de DC  . Boa qualidade de imagem (Ritmo sinusal, IMC <30 Kg/m2)  . Informação aterosclerose | . Calcificação coronária extensa  . Incapacidade colaborar apneia  . Alergia contraste iodado(relativa)  . TFG <30 ml/min (relativa)  . Gravidez  . Radiação  . Arritmias  . Sem informação sobre o impacto funcional das lesões1 |
| *Estudo funcional, não invasivo* | **Orientação relativa à revascularização** | **Sem informação relativa à «carga aterosclerótica»** |
| 1. Ecocardiograma de esforço | . Probabilidade intermédia/alta DC  . Boa janela acústica  . Informações adicionais do comportamento com o esforço (FC, TA, gradiente intraventricular) | . Incapacidade de fazer esforço  . Má janela acústica (se janela acústica difícil utilizar contraste) |
| 1. Ecocardiograma sobrecarga com dobutamina (±contraste ) | . Probabilidade intermédia/alta DC  . Boa janela acústica  . Informação viabilidade | . Má janela acústica  (se janela acústica difícil utilizar contraste)  . Taquiarritmia supraventricularcom RV não controlada  . Disritmias ventriculares |
| 1. RMC com sobrecarga | . Elevada probabilidade DC  . Candidato a revascularização  . Informação viabilidade  . *Gold-standard* para avaliação volumes, massa e fração de ejeção  . Informação adicional relativa à caracterização miocárdica  . Sem radiação | . TFG <30 ml/min (relativa)  . Dispositivos incompatíveis ([www.mri.safety.com](http://www.mri.safety.com/))  . Claustrofobia (relativa)  . Incapacidade colaborar apneia (relativa)  . Alergia gadolínio (muito rara)  . Gravidez |
| 1. CPM/SPECT | . Elevada probabilidade DC  . Candidato a revascularização  . Informação viabilidade | . Obesidade (relativa)  . Intolerância/alergia ao radiofármaco  . Gravidez  . Radiação  . Pior performance nas mulheres |
| 1. PET | . Elevada probabilidade DC  . Candidato a revascularização  . Informação viabilidade | . Gravidez  . Radiação  . Preço e acessibilidade |

1existe a possibilidade de avaliação funcional das estenoses em doentes com estudo por angio-TC, mas esta abordagem é ainda limitada na prática clínica diária

DC – doença coronária; IMC – índice de massa corporal; RV – resposta ventricular; TFG – taxa de filtração glomerular
